# Supplementary material for: Hypoxia/reoxygenation-experienced cancer cell migration and metastasis are regulated by Rap1- and Rac1-GTPase activation via the expression of thymosin beta-4
Source: PubMed Central journal article supplement (PMC4496400; doi:10.18632/oncotarget.3218), 2015-03-23
Supplement: oncotarget-06-9820-s001.pdf [file oncotarget-06-9820-s001.pdf]

## SUPPLEMENTARY FIGURES

| Bait     | Prey    | $\beta$ -gal<br>filter assay                                                       |
|----------|---------|------------------------------------------------------------------------------------|
| pLex     | pJG-TB4 |  |
| pLex-RBD | pJG-TB4 |  |
| pLex-RBD | pJG     |  |
| pLex     | pJG     |  |

**Supplementary Figure 1: Thymosin beta-4 (T $\beta$ 4) binds a Ras-binding domain (RBD) in a yeast two-hybrid assay.** The binding of T $\beta$ 4 to the RBD domain was confirmed by the exchange of vectors. Bait RBD was cloned into the pJG4-5 vector, which was used for cDNA expression, and T $\beta$ 4 was transferred into the pLexA vector (prey). The indicated plasmids were transfected into yeast strain EGY48, and plated on SD/gal/raf/-His/-Trp/-Leu/-Ura medium to select for plasmids expressing interactive hybrid proteins (see Materials and Methods).  $\beta$ -gal lift assays were performed; the blue color indicates a positive signal in the assay.

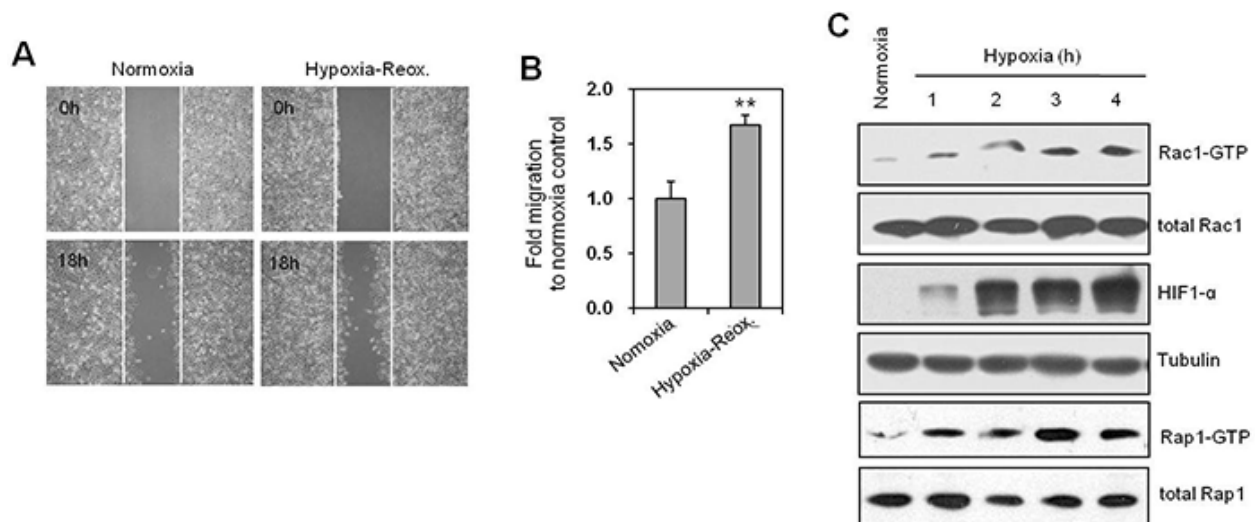

**Supplementary Figure 2: Cell migration is increased under hypoxia-reoxygenation conditions *in vitro*.** (A) HeLa cells were cultured until confluency on 35-mm<sup>2</sup> dishes, and incubated under normoxic conditions. Hypoxia conditioning was carried out by incubation in a 1% O<sub>2</sub> hypoxia chamber for 45 min. A confluent monolayer of HeLa cells was then scratched with a sterile pipet tip and incubated in normoxia for 18 h. The migration of cells into the space left by the scratch was photographed using a phase-contrast microscope at 200 $\times$  magnification. (B) The empty area remaining at each time point was quantified using NIH image analysis software (Image J, version 1.62), and compared to that of the 0-h time point. Data are presented as means  $\pm$  SD. \*\* $p$  < 0.01, relative to controls. (C) HeLa cells were incubated under hypoxia for the indicated times (1–4 h), and harvested in a hypoxia chamber. Rac1 and Rap1 activities were measured by GST-pulldown, and assayed for HIF1- $\alpha$  abundance by western blotting.
